# Supplementary material for: A water-stable copper-based nanosized metal–organic framework for discriminative sensing of amines
Source: Royal Society of Chemistry journal article supplement (doi:10.1039/d4ma00204k), 2024-01-01
Supplement: d4ma00204k1.pdf [file d4ma00204k1.pdf]

## A WATER-STABLE COPPER-BASED NANOSIZED METAL-ORGANIC FRAMEWORK FOR DISCRIMINATIVE SENSING OF AMINES

Pablo Álvarez García,<sup>a</sup> Enrique Álvarez Rubiera,<sup>a</sup> David Gutiérrez Armayor,<sup>b</sup> Candela Melendreras,<sup>b</sup> Ana Belen Soldado,<sup>b</sup> José Manuel Costa,<sup>b</sup> Elena Lastra,<sup>\*a</sup> Fco. J. García Alonso.<sup>\* a,c</sup>

<sup>a</sup>Departamento de Química Orgánica e Inorgánica, Facultad de Química, Avda. Julian Clavería 8, Universidad de Oviedo, 33006 Oviedo, Principado de Asturias, Spain..

<sup>b</sup>Departamento de Química Física y Analítica, Facultad de Química, Avda. Julian Clavería 8, Universidad de Oviedo, 33006 Oviedo, Principado de Asturias, Spain.

<sup>c</sup>Centro de Investigación en Nanomateriales y Nanotecnología, Universidad de Oviedo-CSIC, 33940 El Entrego, Spain.

## Supporting Information

### Contents

- S2. Figure S1: Infrared spectrum of **1** and Figure S2: Infrared spectrum of **1** after stirring a water solution in air overnight.
- S3. Figure S3: DRX spectrum of **1** and Figure S4: DRX spectrum of **1** after stirring a water solution in air overnight.
- S4. Figure S5: TEM micrograph of **1** after stirring a water solution in air overnight and Figure S6: TEM micrograph of **1** synthesized without PAA.
- S5. Figure S7: DLS of **1** and Figure S8: TGA thermogram of **1**.
- S6. Figure S9: UV absorption (A) and emission (B) spectra of **1**.
- S7. FTIR spectra (KBr pellets, cm<sup>-1</sup>) of **1** before and after its reaction with different amine vapors.

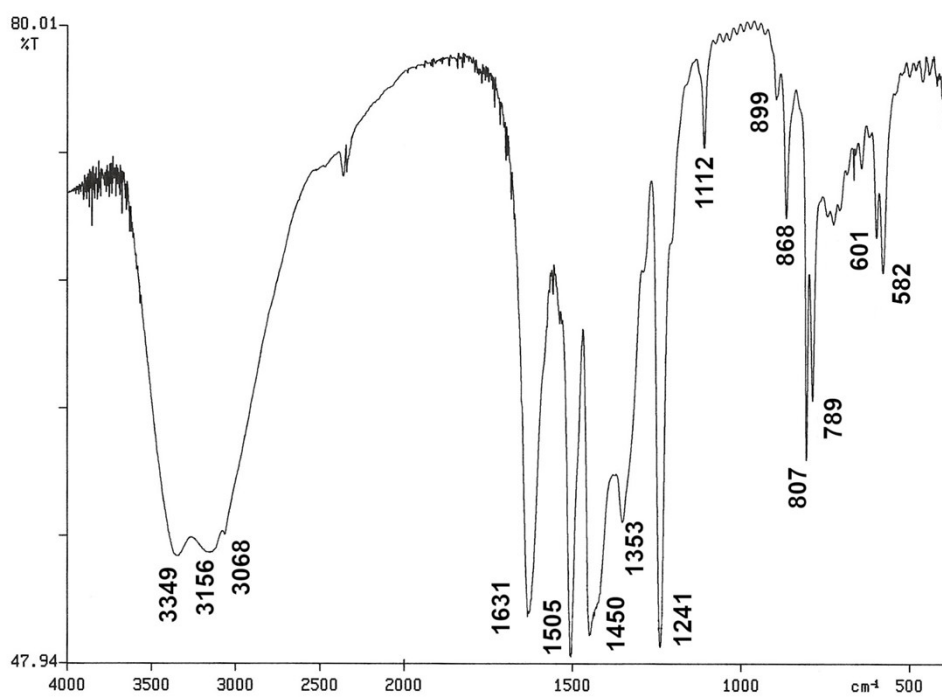

Figure S1. Infrared spectrum of **1**.

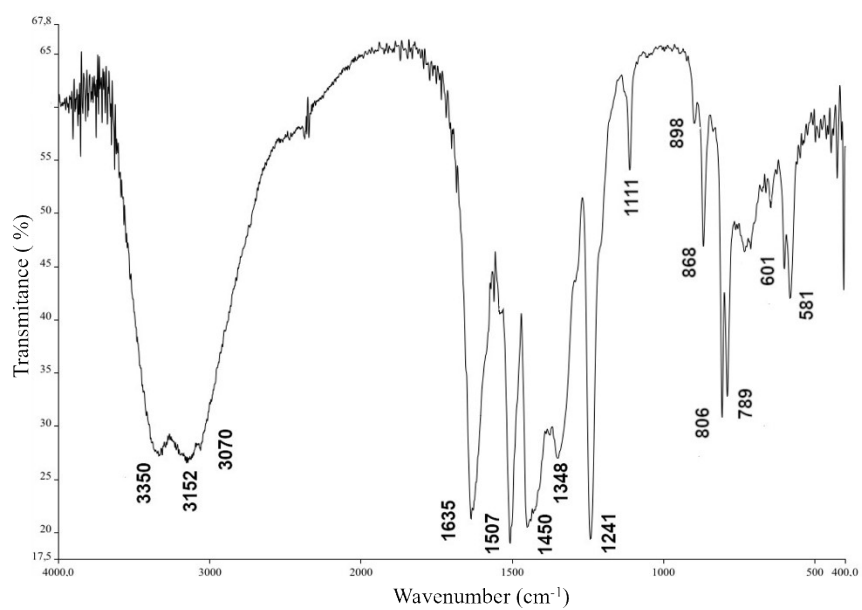

Figure S2. Infrared spectrum of **1** after stirring a water solution in air overnight.

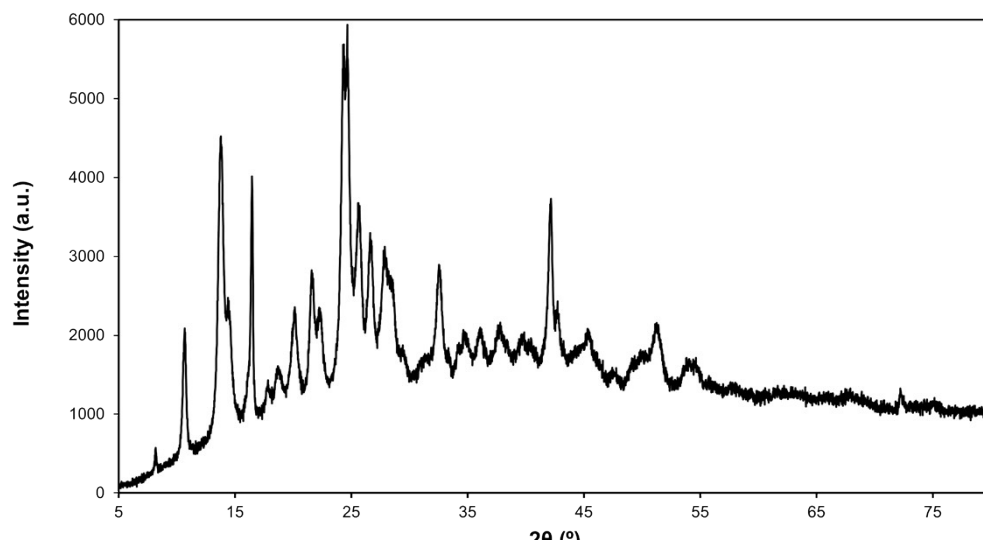

Figure S3. DRX spectrum of **1**.

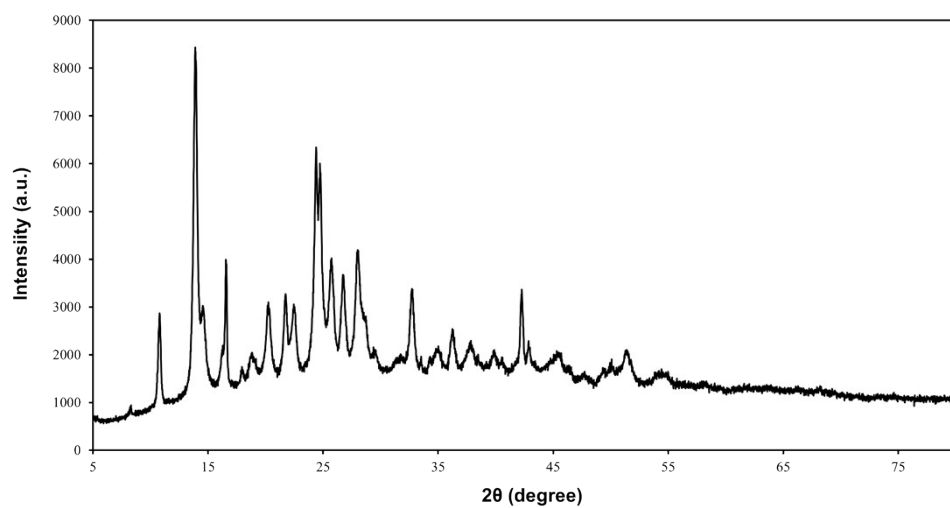

Figure S4. DRX spectrum of **1** after stirring a water solution in air overnight.

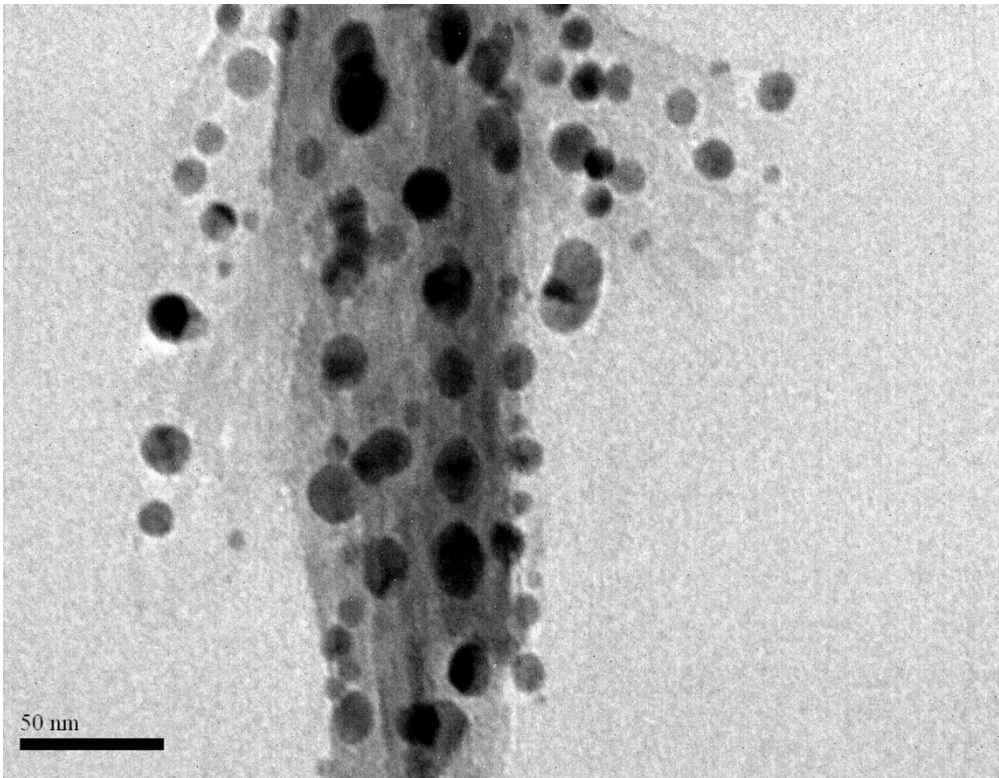

Figure S5. TEM micrograph of **1** after stirring a water solution in air overnight.

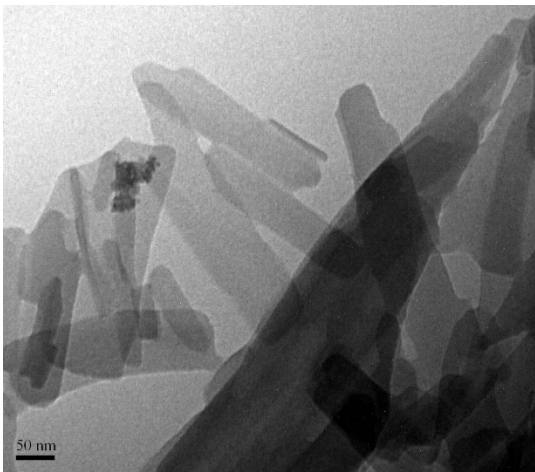

Figure S6. TEM micrograph of **1** synthesized without PAA.

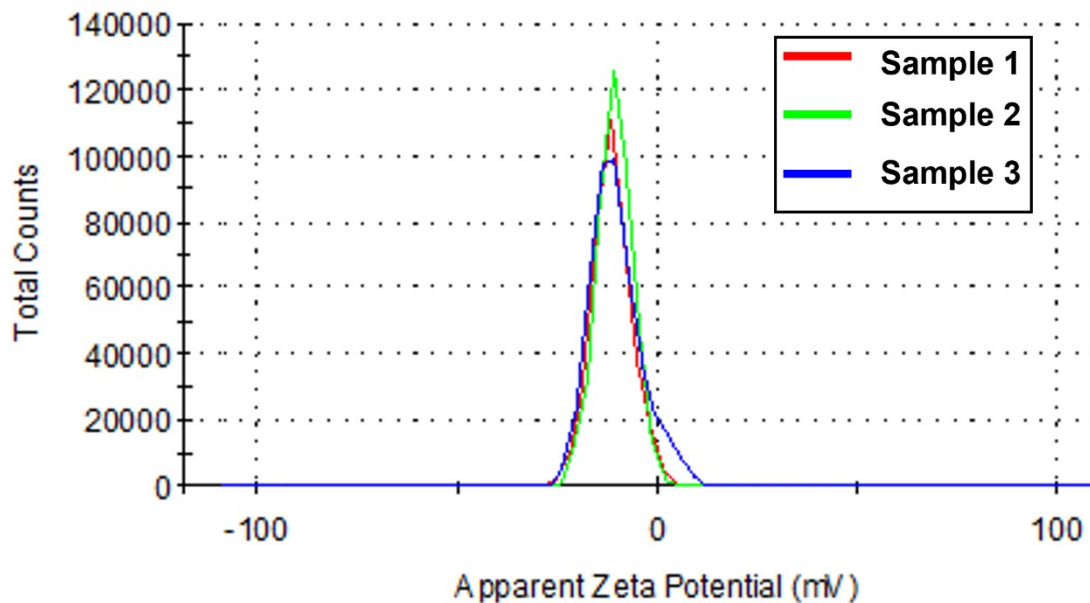

Figure S7. DLS of **1**.

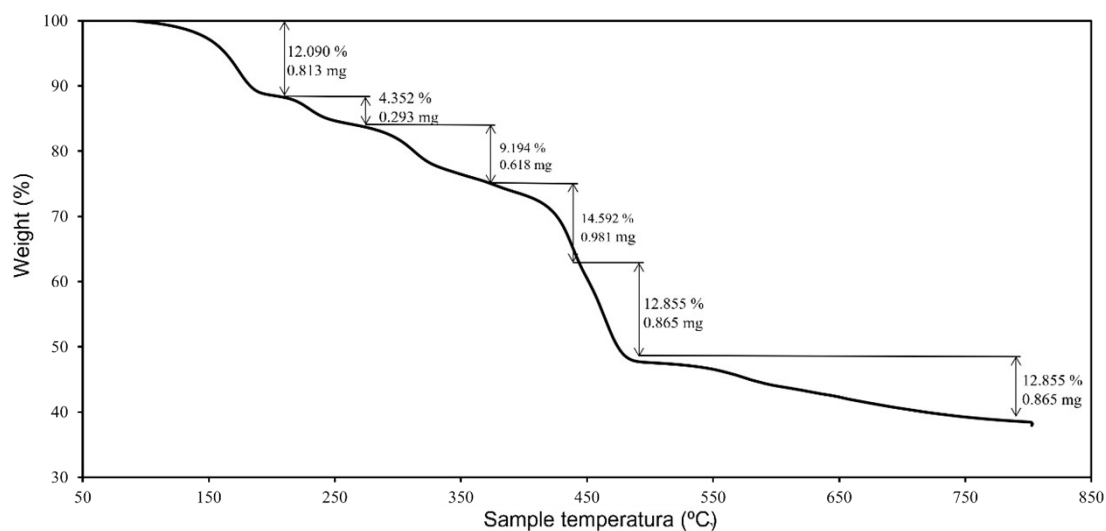

Figure S8. TGA thermogram of **1**. The first weight loss at 173 °C is attributable to the removal of coordinated H<sub>2</sub>O. The second step at 229 °C should correspond to the loss of a tiny amount of coordinated DMF. The presence of rests of DMF would also explain the small percentage of N (around 0,5 %) detected in the elemental analysis. The following weight loss steps should be due to the decomposition of the framework.

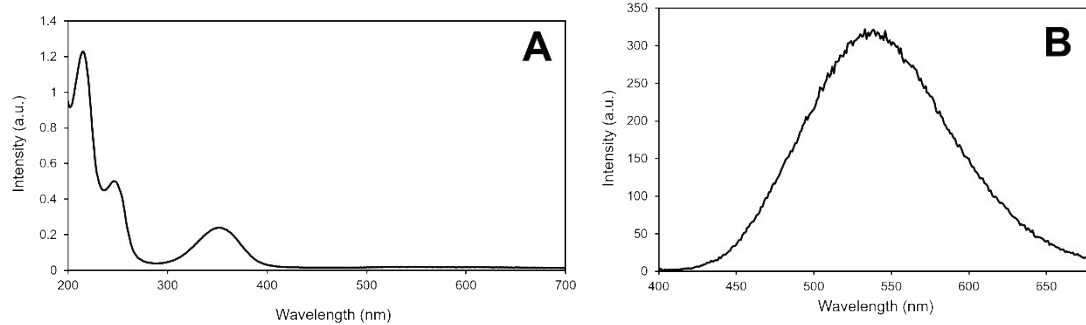

Figure S9. UV absorption (A) and emission (B) spectra of **1**.

**FTIR spectra (KBr pellets, cm<sup>-1</sup>) of 1 before and after its reaction with different amine vapors:**

**n-MOF 1:** 3600-2700 s, vbr, with maxima at 3349, 3156 and 3068 (v-OH, v-CH); 1631 vs, 1505 vs, 1450 vs, 1430 vs, sh, 1353 m (v-COO<sup>-</sup> and v-C=C); 1241 vs (v-C-O); 1209 m.sh; 1112 w; 899 vw; 868 m; 807 m; 789 m, 728 br,m; 645 vw; 601m; 582 m.

**Aniline derivative:** 3600-2700 s, vbr, with maxima at 3338, 3156 and 3068 (v-OH, v-CH); 1634 vs, 1506 vs, 1448 vs, 1430 vs, sh, 1350 m (v-COO<sup>-</sup> and v-C=C); 1240 vs (v-C-O); 1209 m.sh; 1112 w; 899 vw; 868 m; 807 m; 789 m, 732 br, m; 645 vw; 601m; 581 m.

**Triethylamine derivative:** 3600-2700 s, vbr, with maxima at 3367, 3127, 3068 and 2931, 2685 m (v-OH, v-CH); 1623 vs, 1506 vs, 1448 vs, 1430 vs, sh, 1354 m (v-COO<sup>-</sup> and v-C=C); 1238 vs (v-C-O); 1209 m.sh; 1113 w; 894 vw; 868 m; 807 m; 789 m, 729 br, m; 646 vw; 601m; 580 m.

**Pyridine derivative:** 3600-2700 s, vbr, with maxima at 3342, 3117, 3065, and 2931 (v-OH, v-CH); 1627 vs, 1607 vs, sh (pyH<sup>+</sup>); 1506 vs; 1486 vs, sh (Cu-py); 1449 vs; 1419 vs (C<sub>8</sub>H<sub>5</sub>O<sub>6</sub><sup>-</sup>); 1379 s (pyH<sup>+</sup>); 1353 s; 1237 vs (v-C-O); 1155 w; 1111 w; 1070 w (Cu-py); 1046 vw (Cu-py); 901vw; 868 m; 807 m; 789 m, 757 m (pyH<sup>+</sup>); 693 m (Cu-py); 644 vw; 600m; 580 m. (See text).

**Piperidine derivative:** 3400 m, br (v-NH, C<sub>5</sub>H<sub>10</sub>NH<sub>2</sub><sup>+</sup>); 3262 m, br, 3038 m, br (v-OH, v-C<sub>arom</sub>H); 2944 m, 2858 m, 2744 m (v-C<sub>alk</sub>H); 2540 w; 1623 m, 1560 br, s (C<sub>5</sub>H<sub>10</sub>NH<sub>2</sub><sup>+</sup>); 1507 m; 1450 s, sh; 1419 vs (C<sub>8</sub>H<sub>5</sub>O<sub>6</sub><sup>-</sup>); 1340 m; 1237 s (v-C-O); 1205 m; 1111 w; 1083 vw; 1029 vw (C<sub>5</sub>H<sub>10</sub>NH<sub>2</sub><sup>+</sup>); 947 vw (C<sub>5</sub>H<sub>10</sub>NH<sub>2</sub><sup>+</sup>); 875 w; 807 m; 578 w, 438 vw.

**Propylamine derivative:** 3412 m, br (v-NH, C<sub>3</sub>H<sub>7</sub>NH<sub>3</sub><sup>+</sup>); 3254 m, 3167 m, 3048 m (v-OH, v-C<sub>arom</sub>H); 2965 s, 2878 m (v-C<sub>alk</sub>H); 1621 m, 1572 s, sh (C<sub>3</sub>H<sub>7</sub>NH<sub>3</sub><sup>+</sup>); 1539 vs, br; 1514 s, sh; 1457 s; 1408 vs (C<sub>8</sub>H<sub>5</sub>O<sub>6</sub><sup>-</sup>); 1347 m; 1283 m (C<sub>3</sub>H<sub>7</sub>NH<sub>3</sub><sup>+</sup>); 1239 s (v-C-O); 1210 m; 1115 w; 1077 vw (C<sub>3</sub>H<sub>7</sub>NH<sub>3</sub><sup>+</sup>); 1049 w (C<sub>3</sub>H<sub>7</sub>NH<sub>3</sub><sup>+</sup>); 893 w; 834 m; 813 m; 790 w; 753 w; 600 w;

**Ethylamine derivative:** 3436 s, vbr (v-NH, v-OH); 3243 m, br, 3075 m, br (v-C<sub>arom</sub>H); 2985 m, 2727 m, 2535 w, (v-C<sub>alk</sub>H); 1639 m, sh; 1545 s, vbr; 1453 s; 1406 vs (C<sub>8</sub>H<sub>5</sub>O<sub>6</sub><sup>-</sup>); 1340 m; 1288w; 1239 m; 1205 s; 1116 w; 1049 vw; 893 m; 835 s; 814 m, 601 w; 429 vw.

**Diethylamine derivative:** 3392 m, vbr (v-NH, v-OH); 3029 m (v-C<sub>arom</sub>H); 2990 m, 2943m, 2842 m, 2798 m, (v-C<sub>alk</sub>H); 1581 s; 1457 s; 1406 vs (C<sub>8</sub>H<sub>5</sub>O<sub>6</sub><sup>-</sup>); 1333 m; 1243 m; 1207 s; 1117 w; 1058 vw; 890 m; 835 s; 810 m; 595 w; 526 vw; 500 vw.
